# Supplementary material for: Divergence in cellular markers observed in single-cell transcriptomics datasets between cultured primary trabecular meshwork cells and tissues
Source: Springer Nature journal article supplement (doi:10.1038/s41597-025-04528-5), 2025-02-14
Supplement: MOESM1 [file 41597_2025_4528_MOESM1_ESM.pdf]

Supplementary figure 2. comparing norm(n=10) vs glaucoma(n=4) sample data

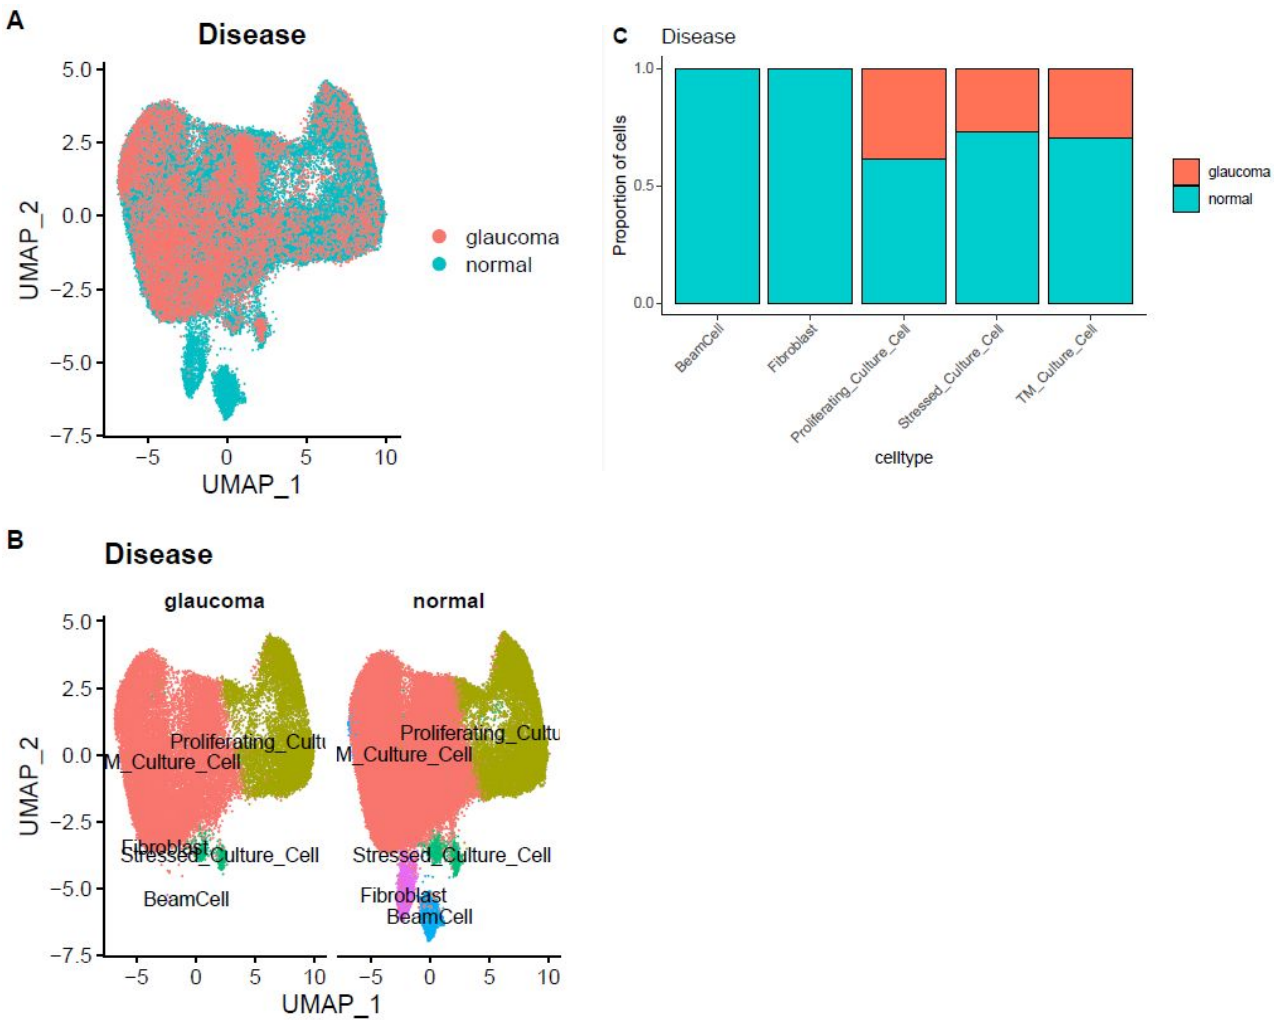

Supplementary table1. Number of cells assigned to individual cell clusters

| celltype                   | Normal cells |                | Glaucomatous cells |                | Total |
|----------------------------|--------------|----------------|--------------------|----------------|-------|
|                            | cells        | Proportion (%) | cells              | Proportion (%) |       |
| TM_Culture_Cell            | 41591        | 73.1           | 17772              | 69.3           |       |
| Proliferating_Culture_Cell | 11734        | 20.6           | 7457               | 29.1           |       |
| Stressed_Culture_Cell      | 1118         | 2              | 415                | 1.6            |       |
| BeamCell                   | 1273         | 2.2            | 1                  | 0              |       |
| Fibroblast                 | 1178         | 2.1            | 4                  | 0              |       |
| Total                      | 56894        | 100            | 25649              | 100            | 82543 |

**Supplementary figure3. Scatter plots for correlation of highly variable genes (HVGs, n=2000) between normal and glaucoma**

**A. TM culture cell**

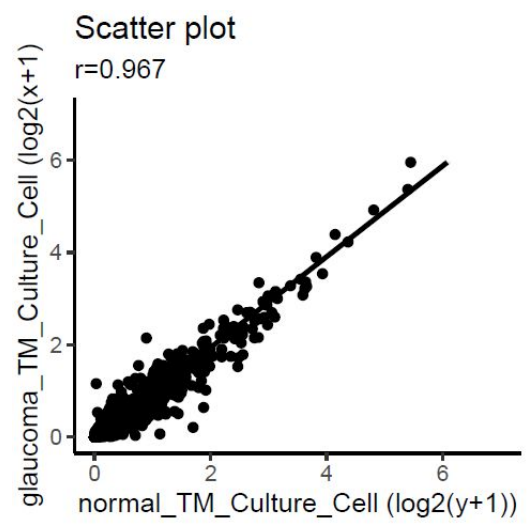

**B. Proliferating Culture Cells**

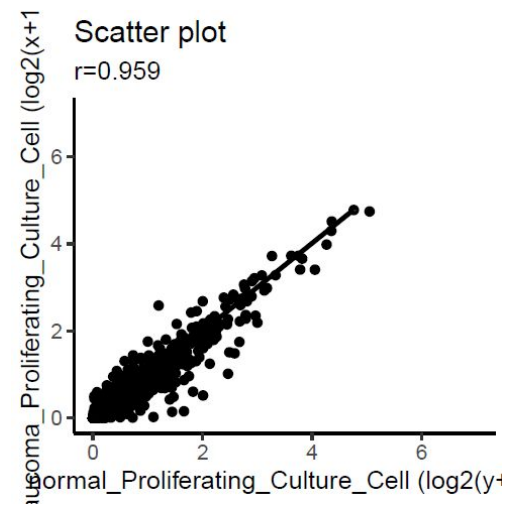

**C. Stressed culture cell**

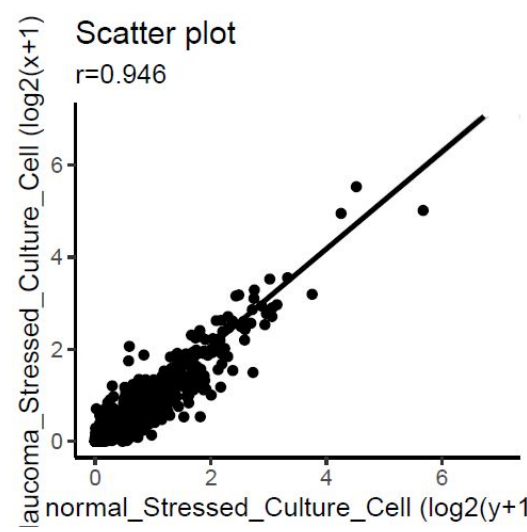

Supplementary figure 4. Sub-group analysis: superimpose normal\_cells to normal TM tissue data

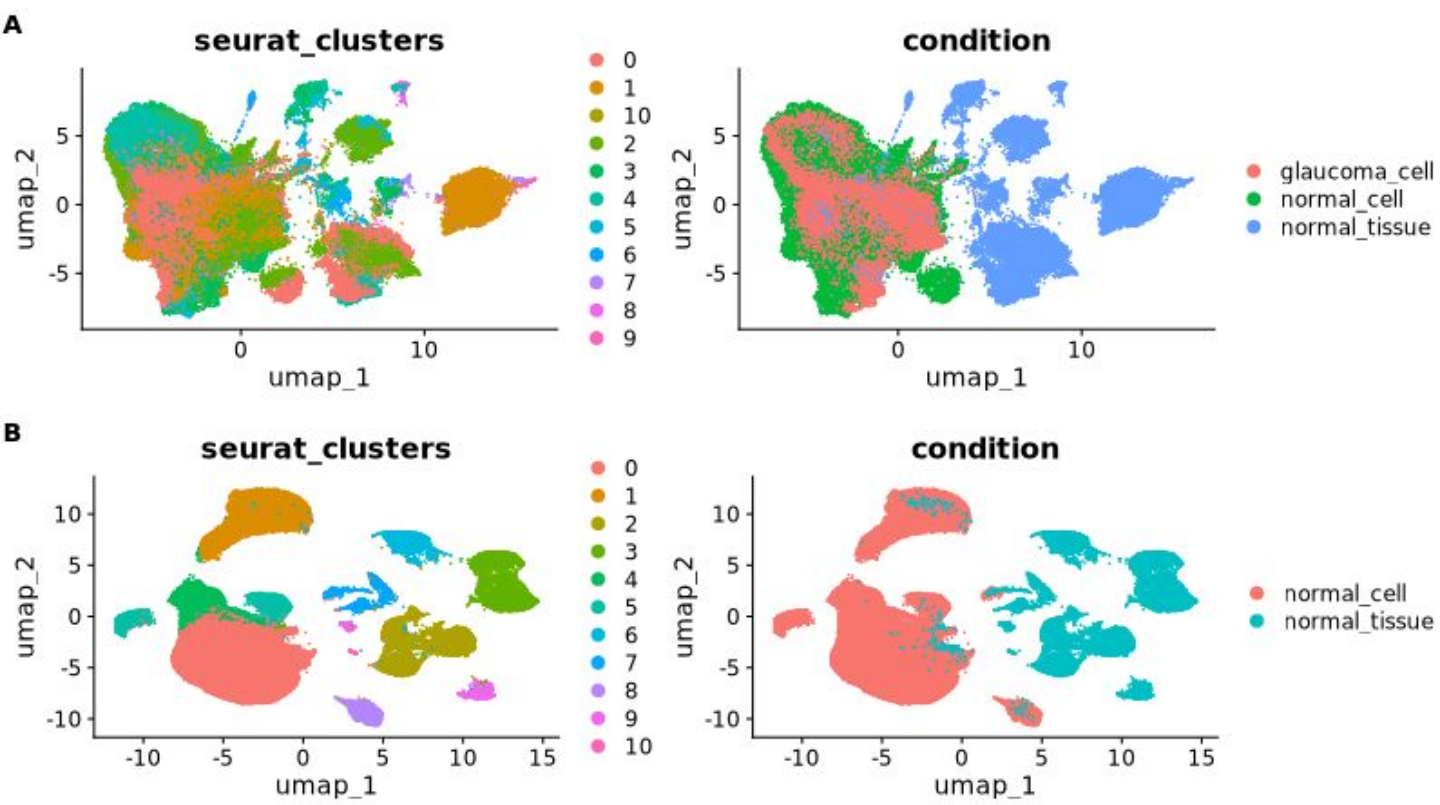

A. Data integration and clustering for 3 groups: glaucomatous cells, normal cells, and normal tissues from Chen lab. B. Data integration and clustering for 2 groups: normal cells, and normal tissues.

Supplementary figure 5. Further sub-clustering of hTM cell data and assessing cell types using published known cell markers

A. rs=0.1

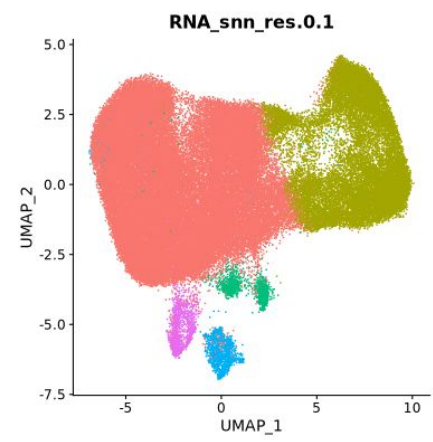

Known cell markers from Sanes group in Table4\*

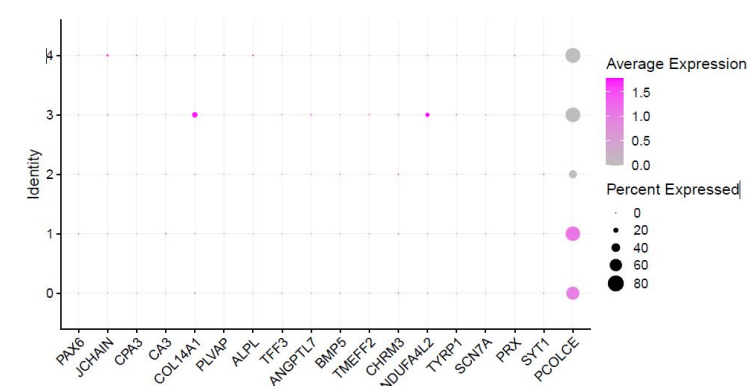

B. rs=0.3

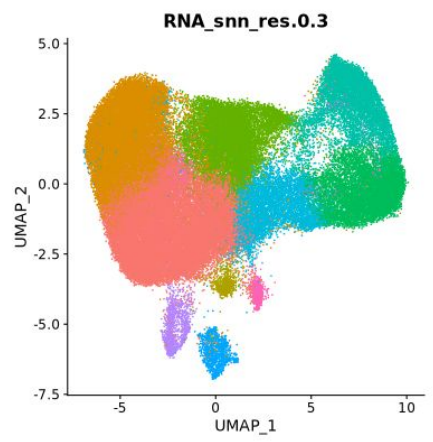

Known cell markers from Sanes group in Table4\*

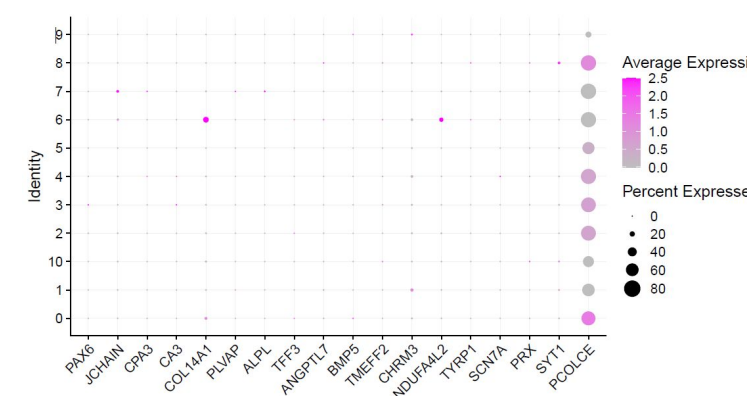

C. rs=0.5

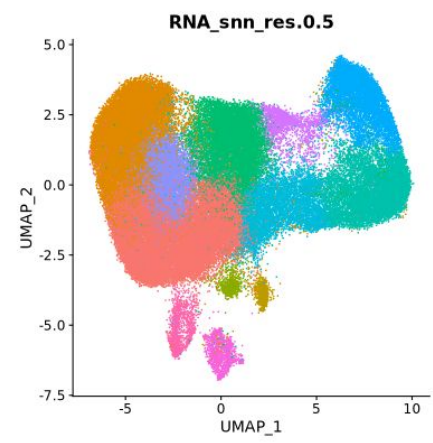

Known cell markers from Sanes group in Table4\*

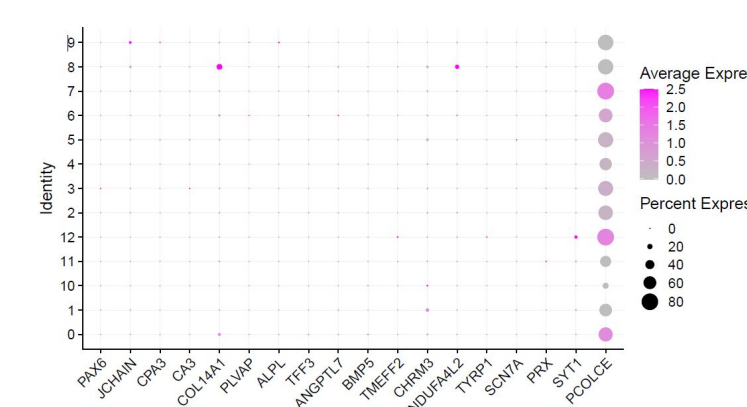

\* Known cell markers: To assess the cell type reported cell markers used from publication (Cell Atlas of Human Trabecular Meshwork and Aqueous Outflow Structures, Zyl et al., 2000).
